# Supplementary material for: Swelling and Shrinking Properties of Thermo-Responsive Polymeric Ionic Liquid Hydrogels with Embedded Linear pNIPAAM
Source: MDPI journal article supplement (doi:10.3390/ijms15045337), 2014-03-27
Supplement: s1 [file s1]

# Supplementary Information

## 1. Example of Shrinking Measurement

**Figure S1.** Three examples of IPN 4 in deionized water at 40 °C captured with Aigo GE-5 microscope with a 60× objective lens and the diameter measured using Aigo ScopeImage 9.0 software. The measured diameters are then compared with a MATLAB R2010a program for validation purposes.

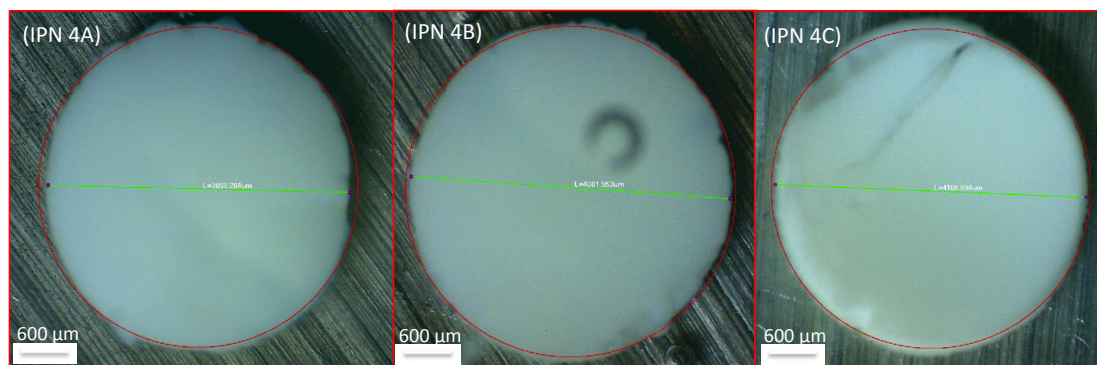

| Sample | Microscope Diameter (mm) | MATLAB Circle Diameter (mm) |
|--------|--------------------------|-----------------------------|
| IPN 4A | 3.898                    | 4.123                       |
| IPN 4B | 4.081                    | 4.211                       |
| IPN 4C | 4.106                    | 4.258                       |

## 2. Swelling and Reswelling Kinetics

The shrinking and reswelling kinetics were modeled using the Boltzmann sigmoidal function given below.

$$y = \frac{A_1 - A_2}{1 + e^{(x-x_0)/dx}} + A_2 \quad (S1)$$

where  $A_1$  is the low  $Y$  limit,  $A_2$  is the high  $Y$  limit,  $x_0$  is the inflection (half amplitude) point and  $dx$  is the width.

For IPN1-4, the slope at  $x_0$  was calculated with the formula: slope =  $(A_2 - A_1)/4dx$ , according to the BOLTZMANN equation.

For P-SPA the slope was calculated graphically as the data does not show an inflection point.

Example of fitting of experimental data of shrinking kinetics using Boltzmann sigmoidal function;

## 3. IPN 3

Adj. R-Square 0.9993

|   |    | Value    | Standard Error |
|---|----|----------|----------------|
| B | A1 | 1.00315  | 0.00333        |
| B | A2 | 0.60235  | 0.00338        |
| B | x0 | 47.67935 | 0.22474        |
| B | dx | 6.008    | 0.21836        |

Slope calculated = -0.0166

**Figure S2.** Shrinking data of IPN 3 fitted using Boltzmann sigmoidal function.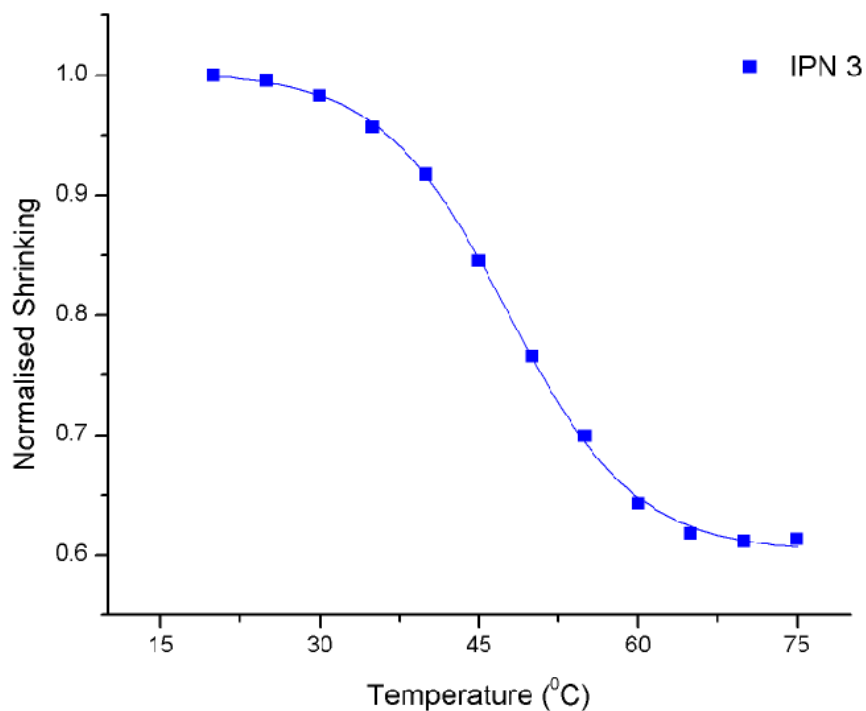

#### 4. Thermal Behavior of Hydrogels

**Table S1.** LCST peak value ranges of hydrogels and subsequent comments.

| Hydrogel | LCST (°C)   | Comment            |
|----------|-------------|--------------------|
| P-SPA    | 32.36–36.13 | broad, featureless |
| IPN-1    | 33.49–35.87 | Distinct feature   |
| IPN-2    | 37.51–39.38 | Distinct feature   |
| IPN-3    | 36.57–37.98 | Distinct feature   |
| IPN-4    | 33.88–35.66 | Distinct feature   |

© 2014 by the authors; licensee MDPI, Basel, Switzerland. This article is an open access article distributed under the terms and conditions of the Creative Commons Attribution license (<http://creativecommons.org/licenses/by/3.0/>).
